# Supplementary material for: Two mega sand and dust storm events over northern China in March 2021: transport processes, historical ranking and meteorological drivers
Source: Copernicus journal article supplement (doi:10.5194/acp-2021-933), 2021-12-01
Supplement: Supplementary file 1 [file acp-2021-933-supplement-version2.pdf]

**Supplementary Information for**

**Record-breaking dust loading during two mega dust storm events over northern China in March 2021: aerosol optical/radiative properties and meteorological drivers**

5 Ke Gui<sup>1</sup>, Wenrui Yao<sup>1,2</sup>, Huizheng Che<sup>1,\*</sup>, Linchang An<sup>3</sup>, Lei Li<sup>1</sup>, Yu Zheng<sup>1</sup>, Hujia Zhao<sup>4</sup>, Lei Zhang<sup>1</sup>,  
Junting Zhong<sup>1</sup>, Yaqiang Wang<sup>1</sup>, Xiaoye Zhang<sup>1</sup>

<sup>1</sup> State Key Laboratory of Severe Weather & Key Laboratory of Atmospheric Chemistry of CMA, Chinese Academy of Meteorological Sciences, Beijing, 100081, China

10 <sup>2</sup> Department of Atmospheric and Oceanic Sciences & Institute of Atmospheric Sciences, Fudan University, Shanghai, 200438, China

<sup>3</sup> National Meteorological Center, CMA, Beijing 100081, China

<sup>4</sup> Institute of Atmospheric Environment, China Meteorological Administration, Shenyang, 110166, China

15 *Correspondence to:* Huizheng Che ([chehz@cma.gov.cn](mailto:chehz@cma.gov.cn))

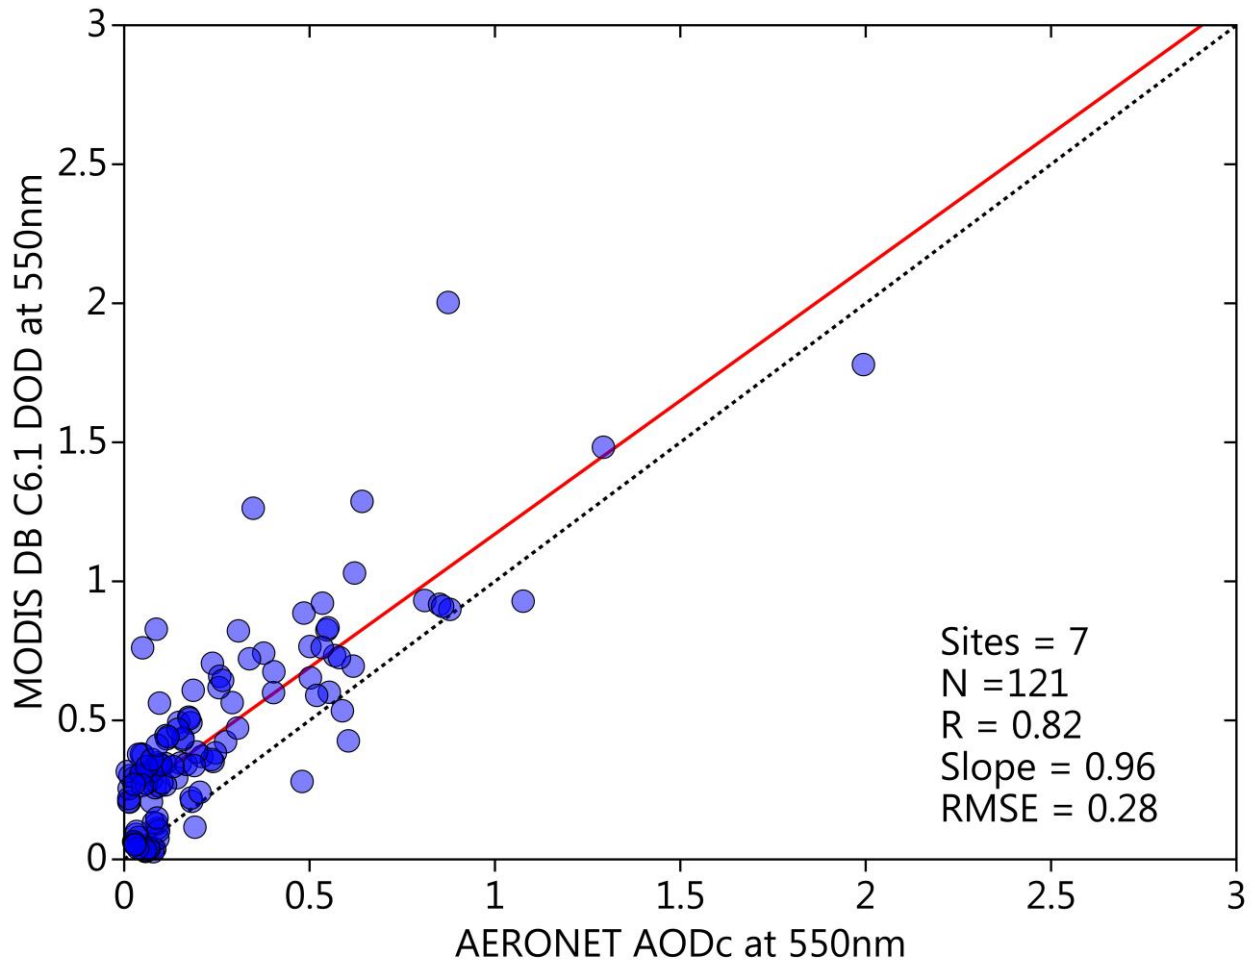

Figure S1: Scatter plot of the daily mean MODIS DOD against the AERONET coarse-mode AOD (AODc) retrieved at 550nm.

20

The 1-to-1 line and linear regression line are shown by black dotted and red solid lines, respectively. The number of sites (Sites), matchups (N), Pearson correlation coefficient ( $R$ ), slope, and root mean square error (RMSE) of the linear regression are indicated in the lower right of the panel.

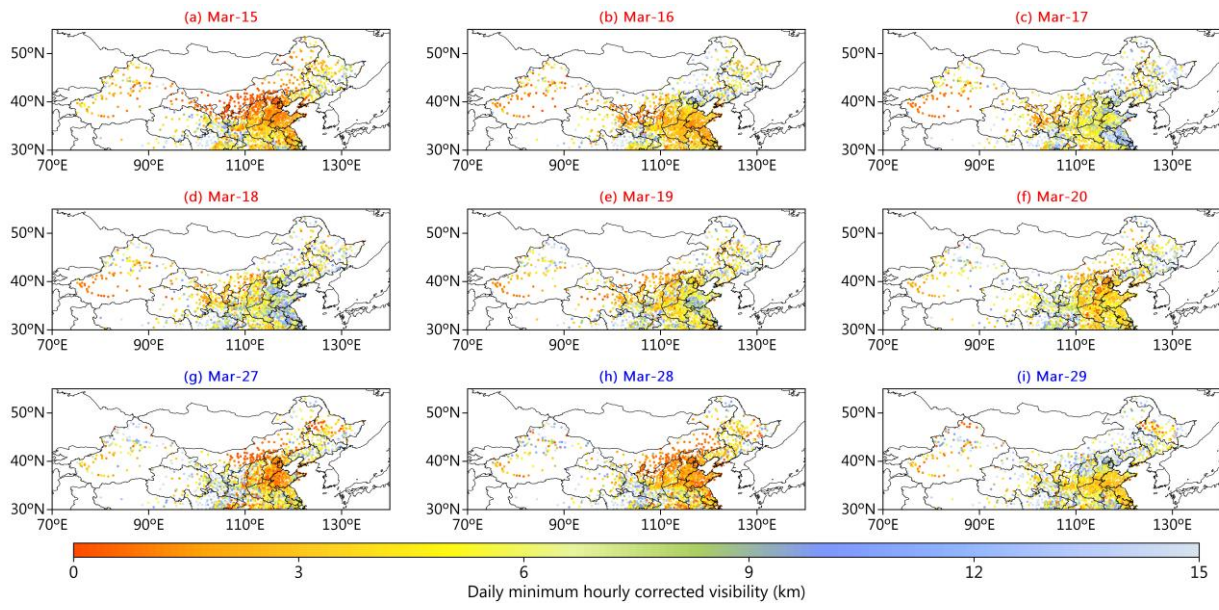

25 **Figure S2: Evolution of observed daily minimum hourly corrected visibility during (a–f) the 3.15 event (March 15–20, 2021) and (g–i) the 3.27 event (March 27–29, 2021).**

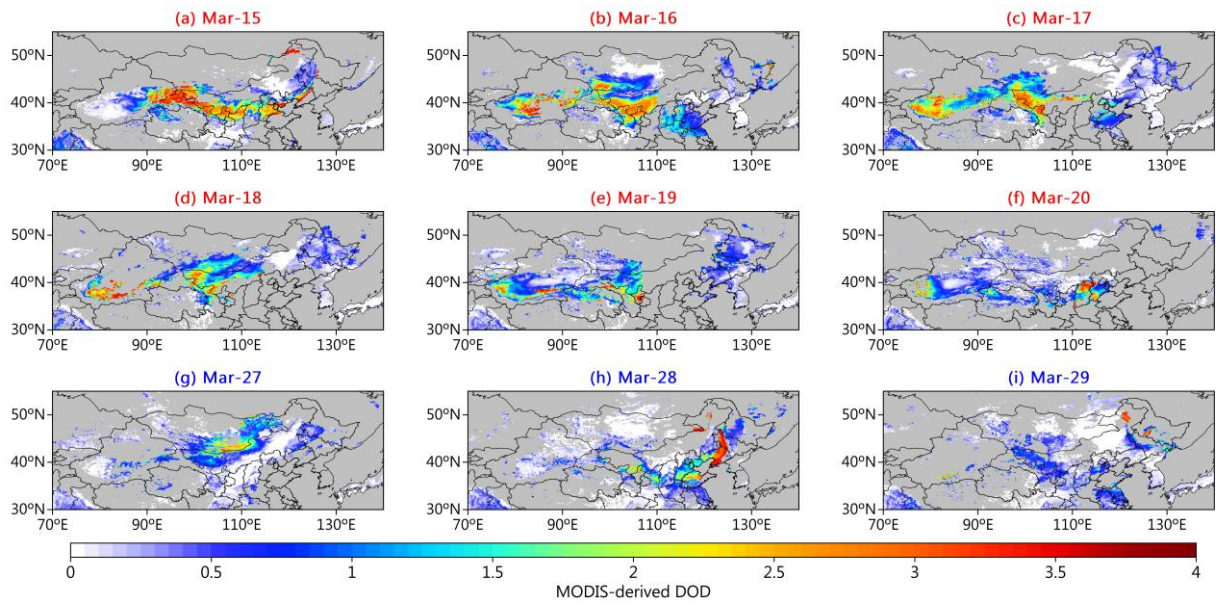

**Figure S3: Evolution of Aqua and Terra combined daily mean DOD during (a–f) the 3.15 event and (g–i) the 3.27 event.**

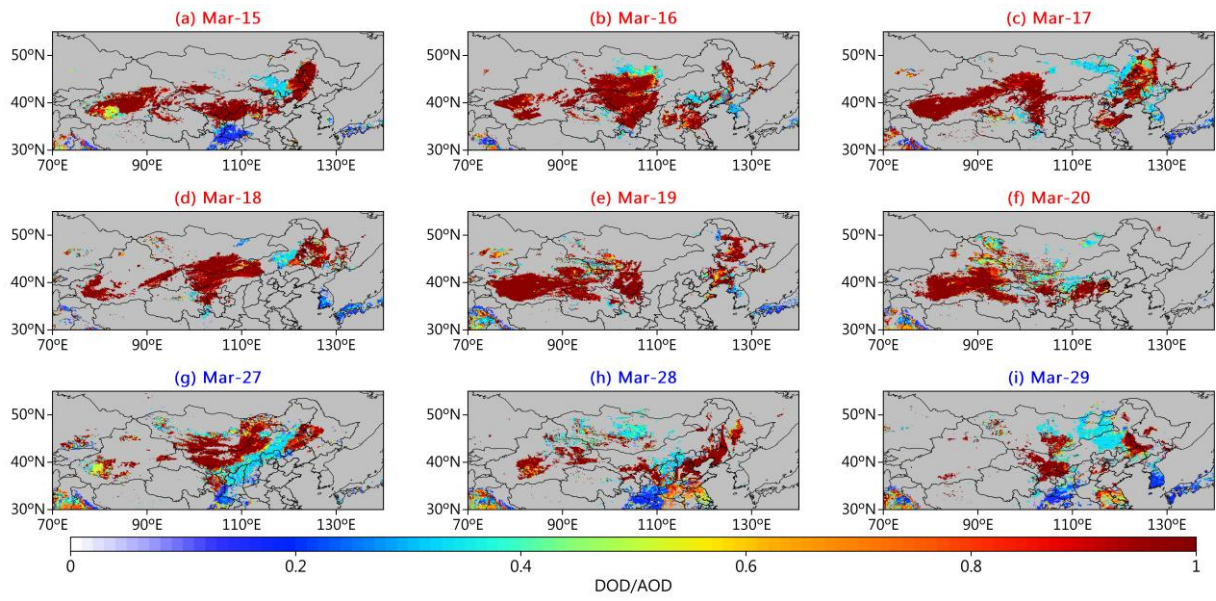

**Figure S4: As in Fig. S3 but for the daily mean DOD as a proportion of total AOD.**

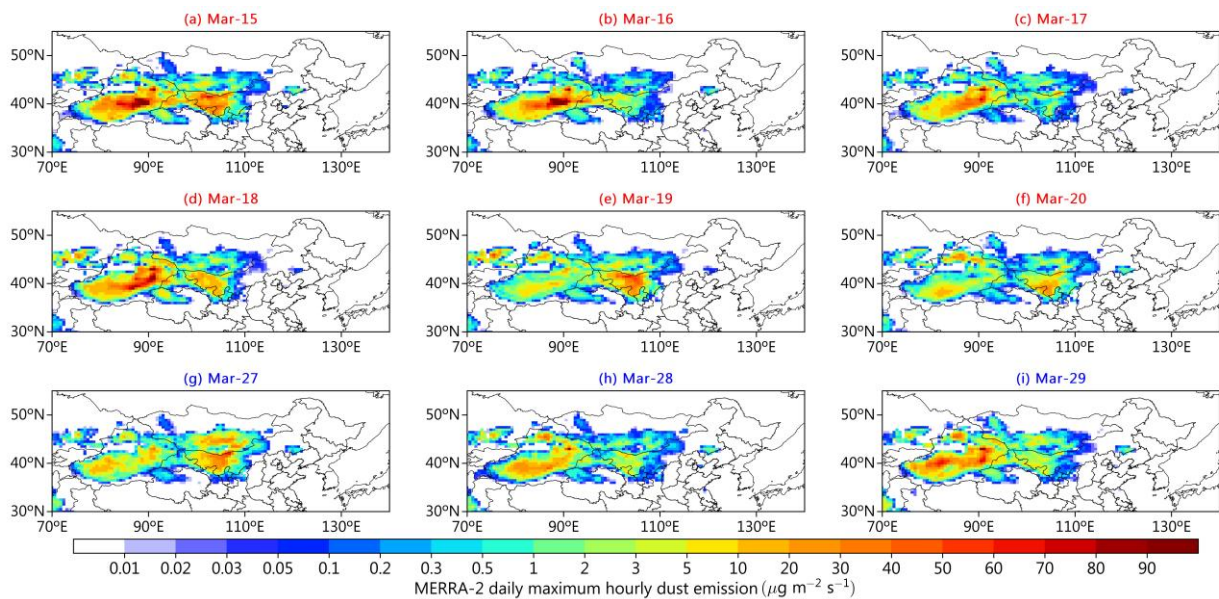

35

**Figure S5: Evolution of MERRA-2 daily maximum hourly dust emissions for all size bins during (a–f) the 3.15 event and (g–i) the 3.27 event.**

40



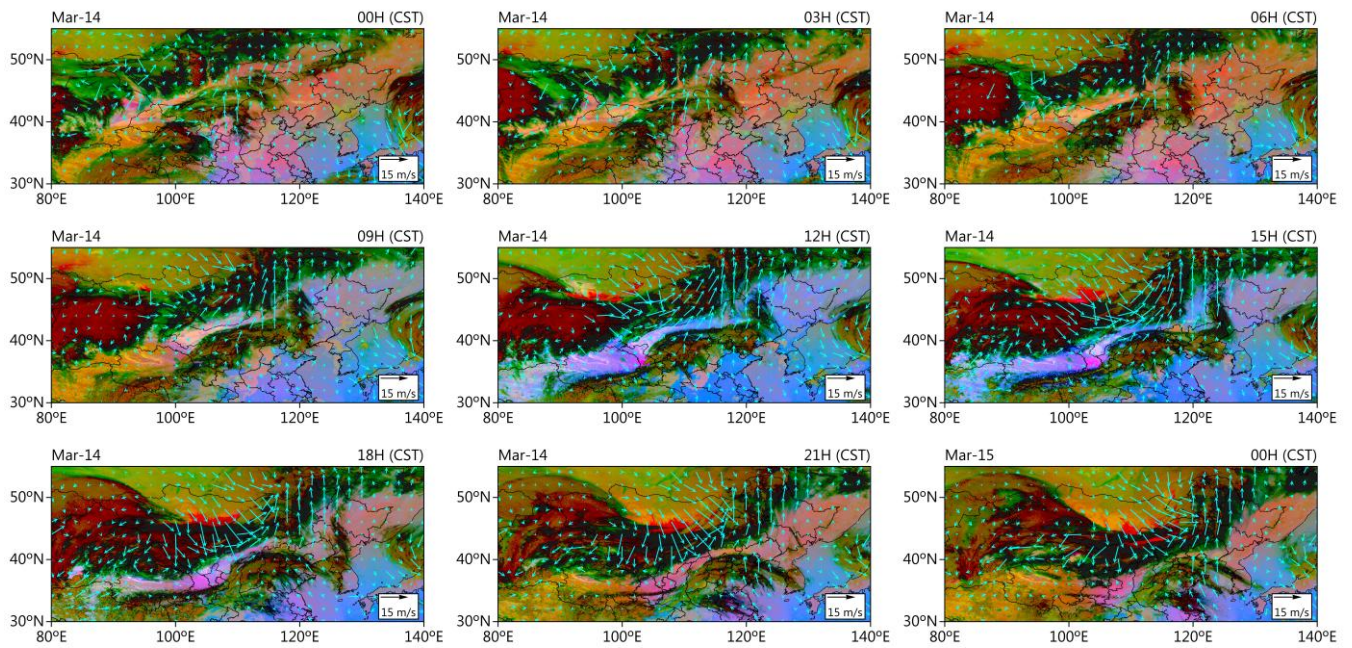

**Figure S6: The 3-h evolution of dust plumes (magenta) as revealed by Himawari-8 dust RGB composite images on March 14, 2021. Overlaid on the RGB imagery is the 3-h ERA5 wind vectors at 10m.**

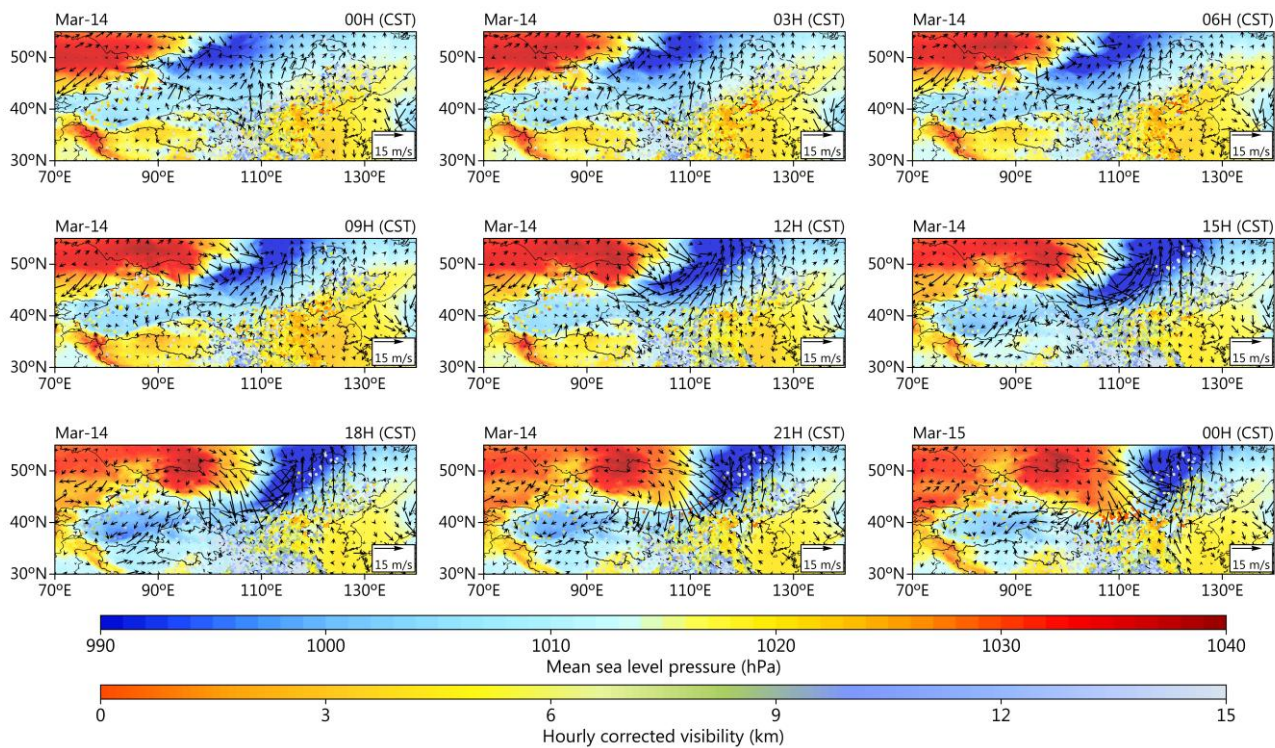

**Figure S7: The 3-h pattern evolutions of ERA5 mean sea level pressure (SLP) and 10 m wind vectors on March 14, 2021. Overlaid on the SLP is the observed 3-h corrected visibility.**



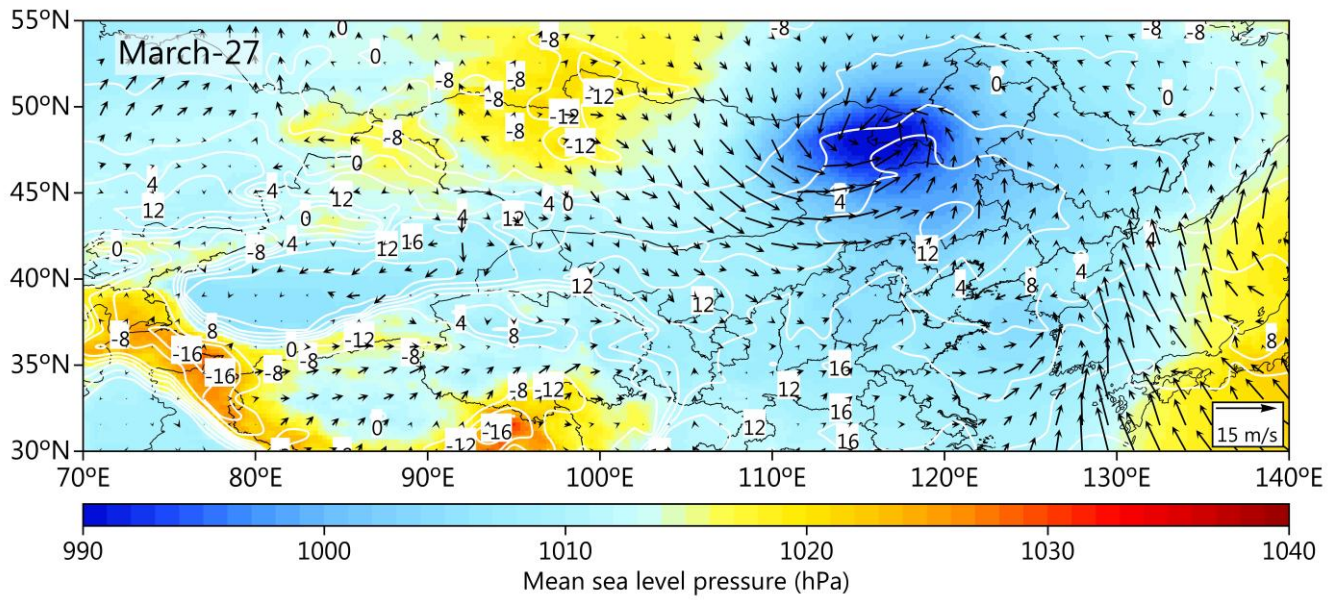

**Figure S8: Daily mean SLP (shading; hPa) and temperature at 2 m (contour; °C) on March 27, 2021. Overlaid on the map are the ERA5 wind vectors at 10 m.**

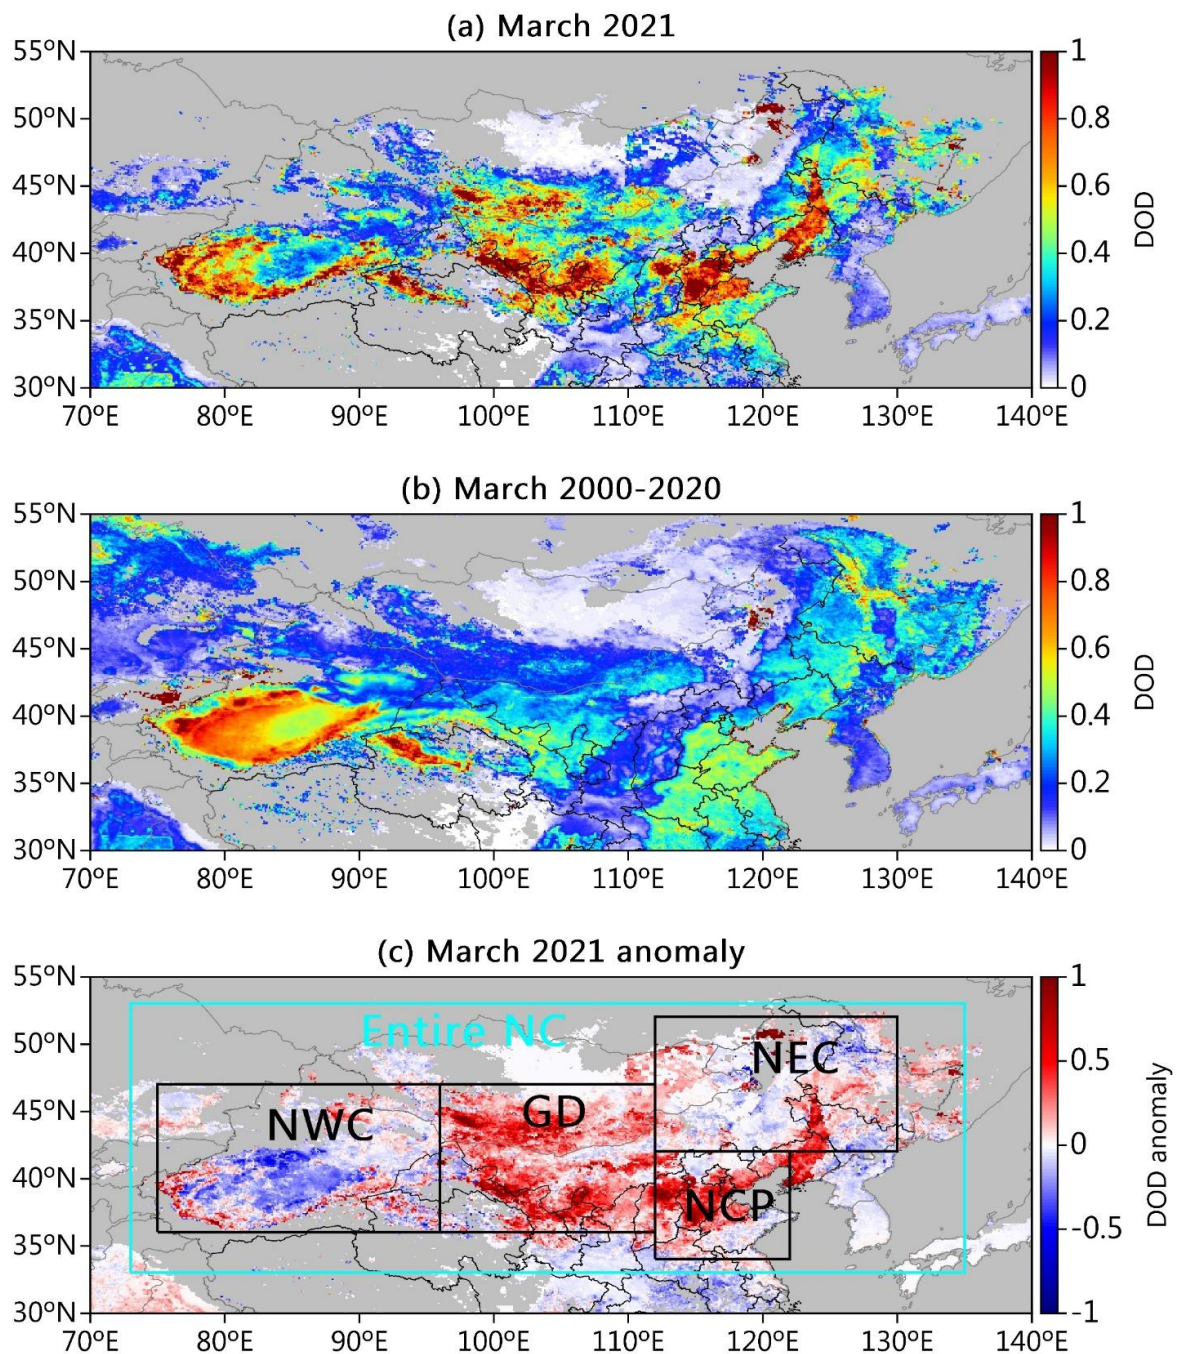

55

**Figure S9: DOD retrieved from MODIS/Terra: (a) March 2021; (b) March climatology (2000–2020); (c) March 2021 anomaly. Cyan and black boxes denote the averaging areas for the DOD time series.**



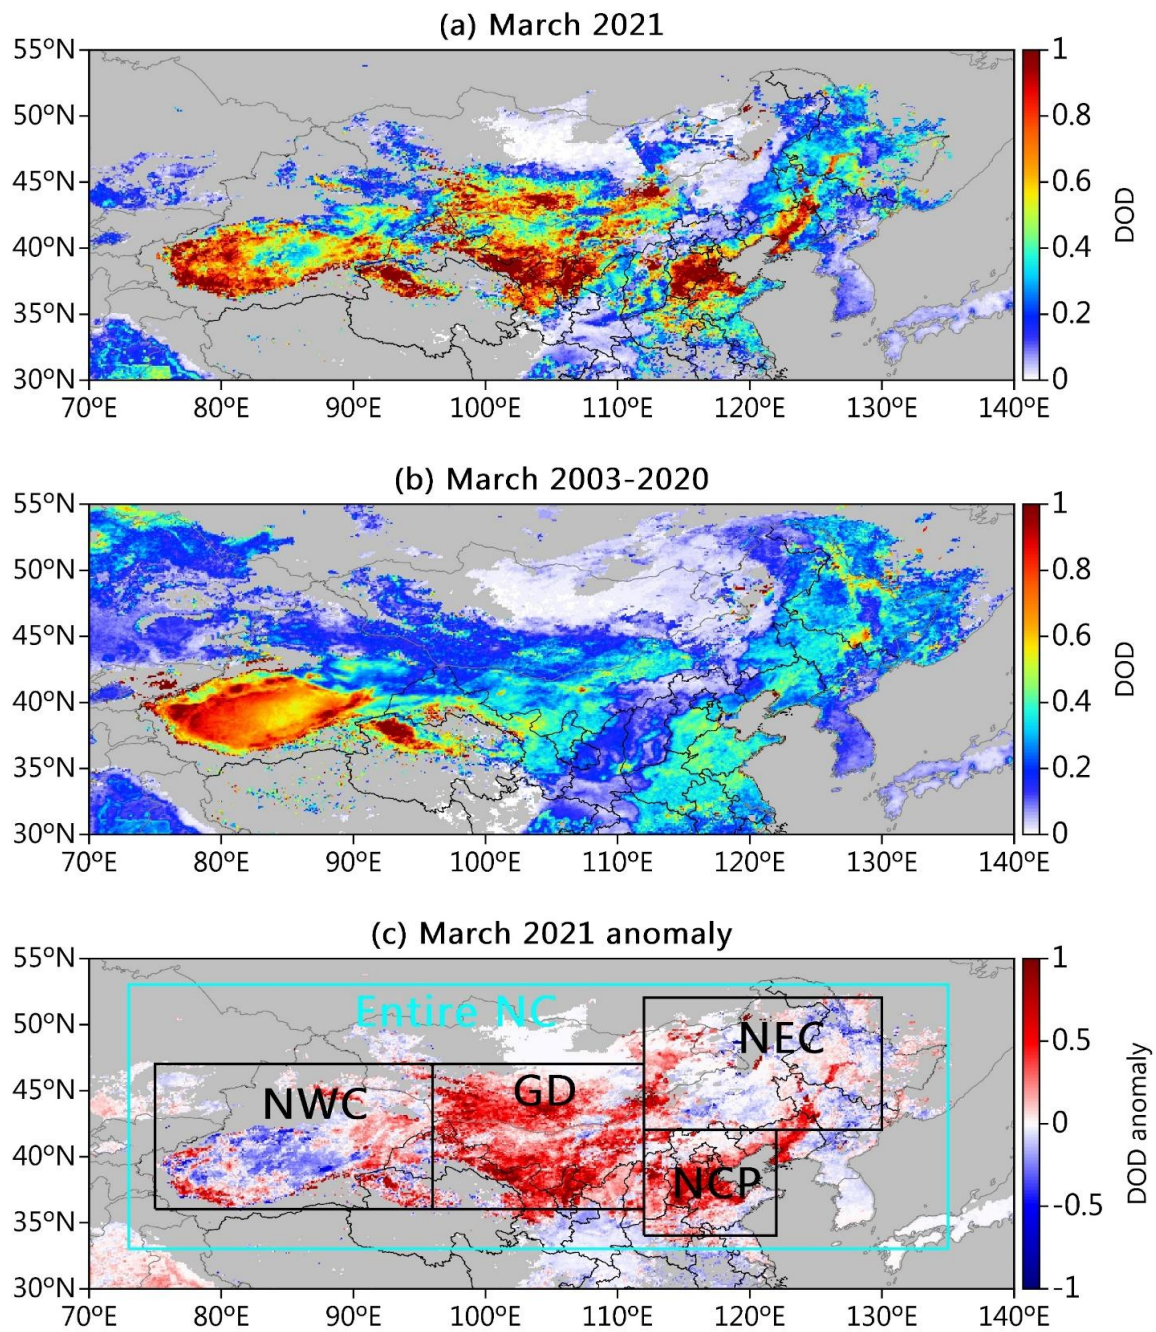

60 Figure S10: DOD retrieved from MODIS/Aqua: (a) March 2021; (b) March climatology (2003–2020); (c) March 2021 anomaly.

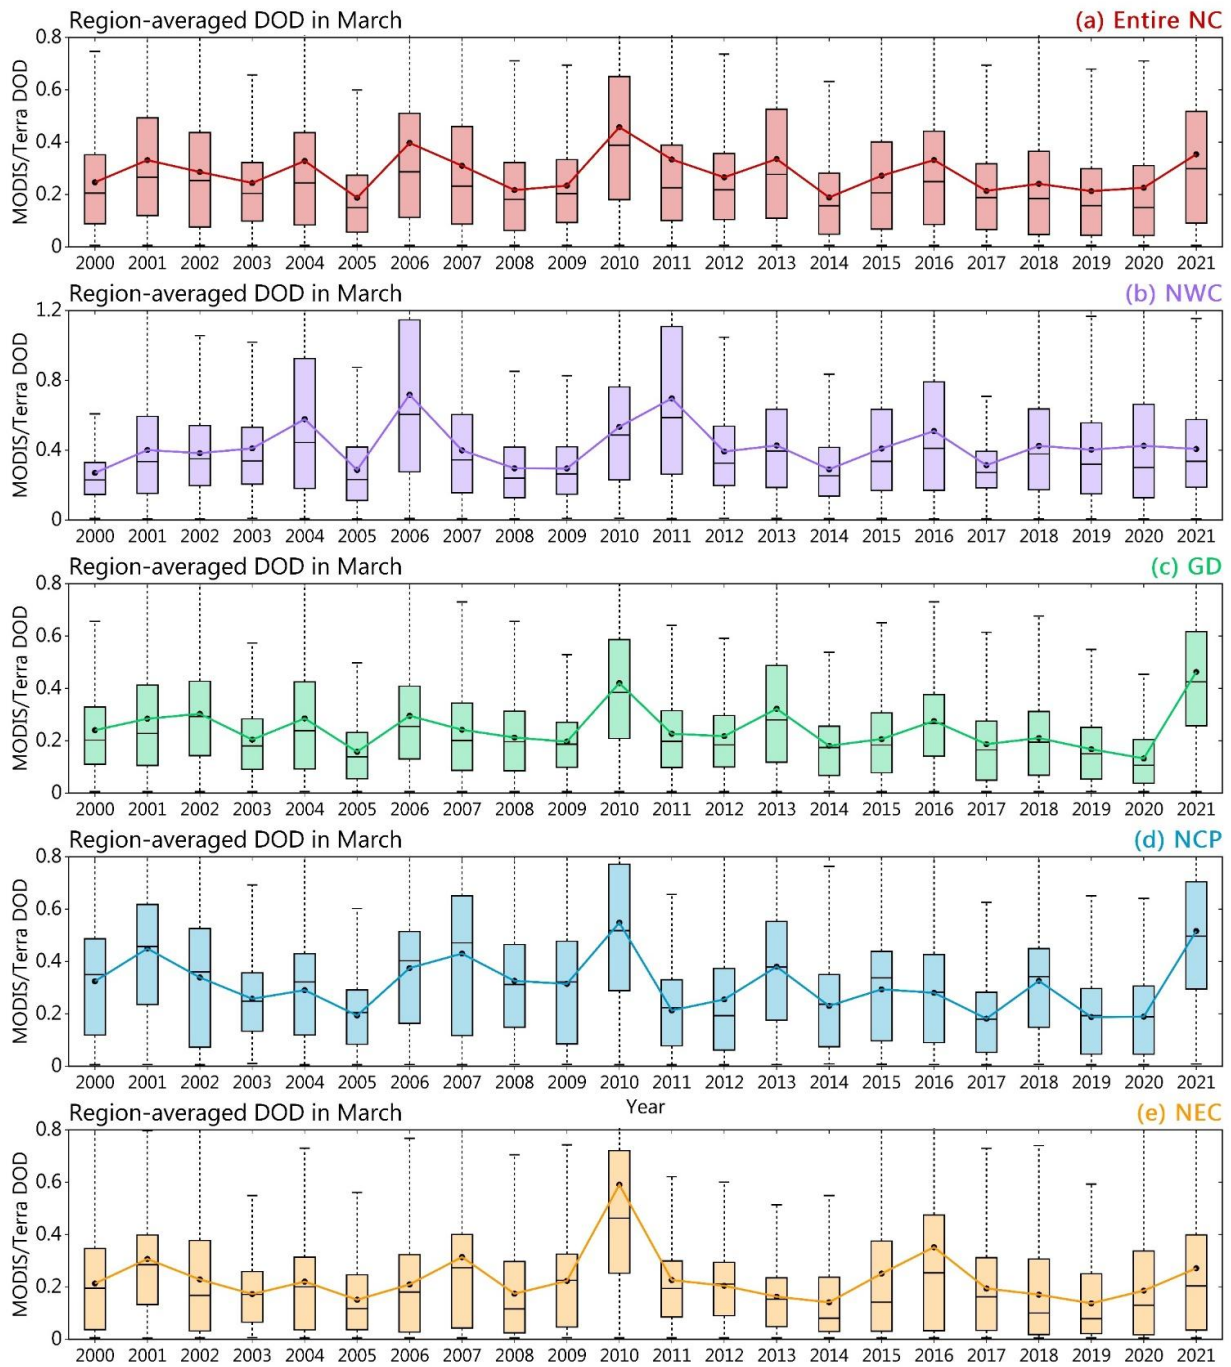

**Figure S11: Time-series boxplots of the regional-averaged DOD retrieved from MODIS/Terra over (a) the entire NC region, (b) NWC, (c) the GD, (d) the NCP, and (e) NEC in March from 2000 to 2021.**

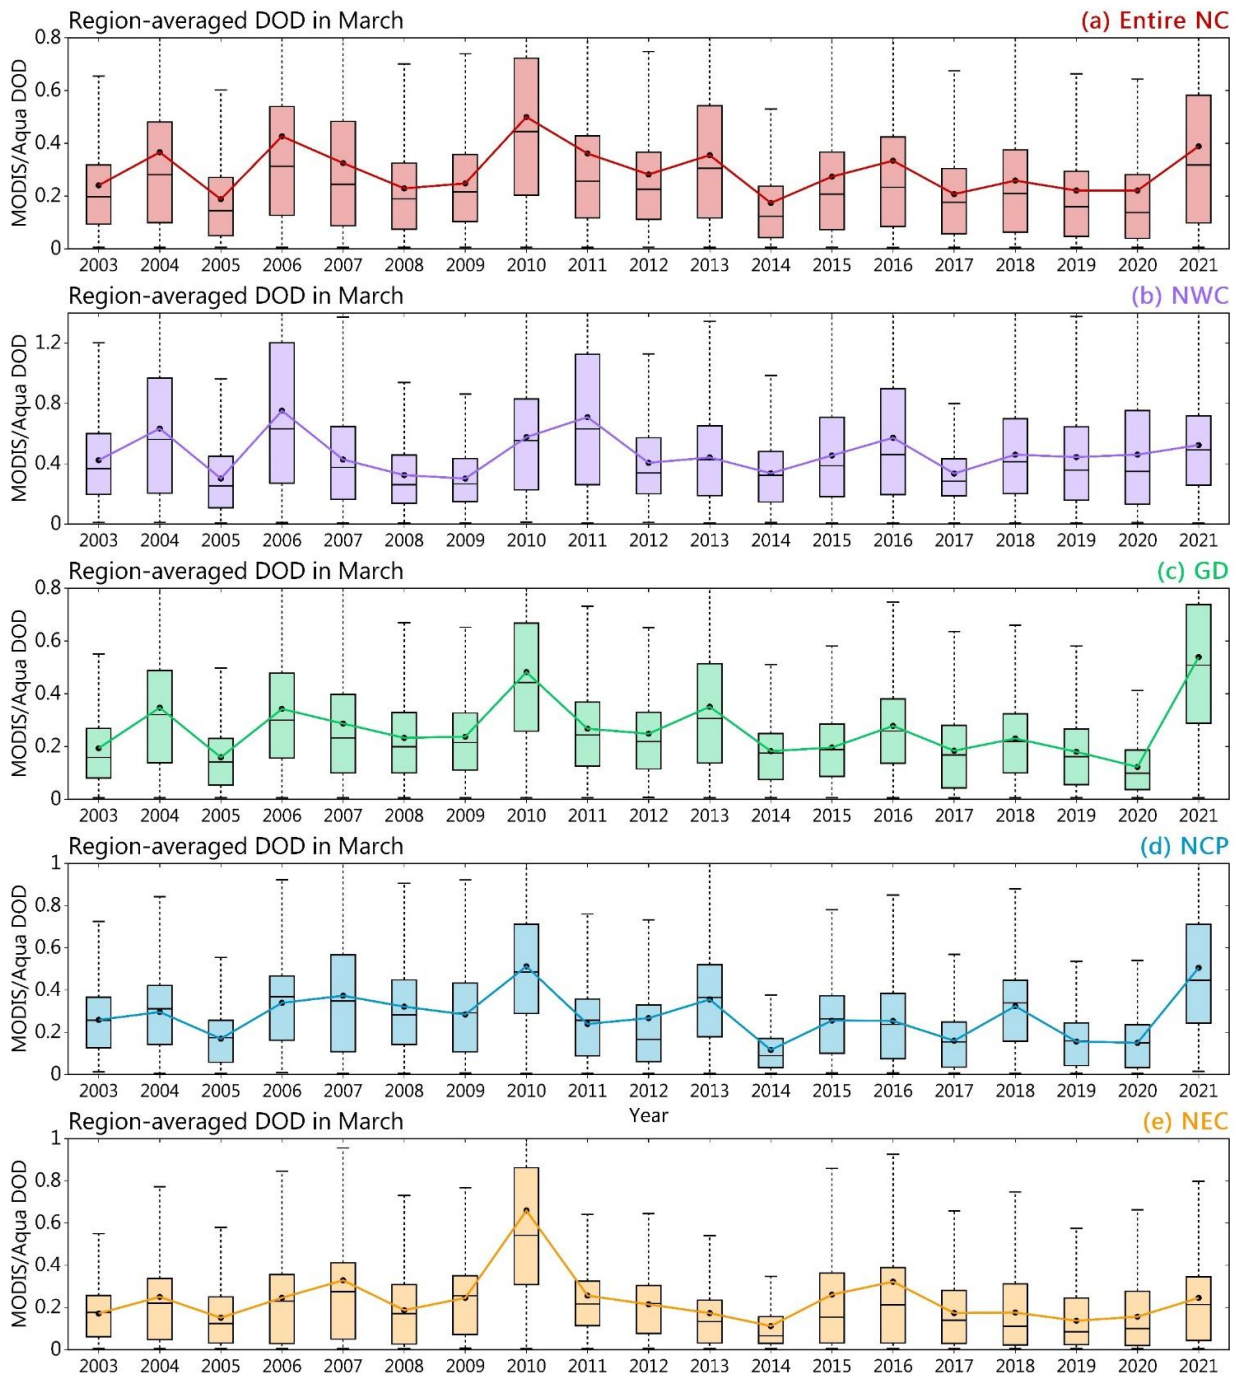

65

**Figure S12: Time-series boxplots of the regional-averaged DOD retrieved from MODIS/Aqua over (a) the entire NC region, (b) NWC, (c) the GD, (d) the NCP, and (e) NEC in March from 2003 to 2021.**



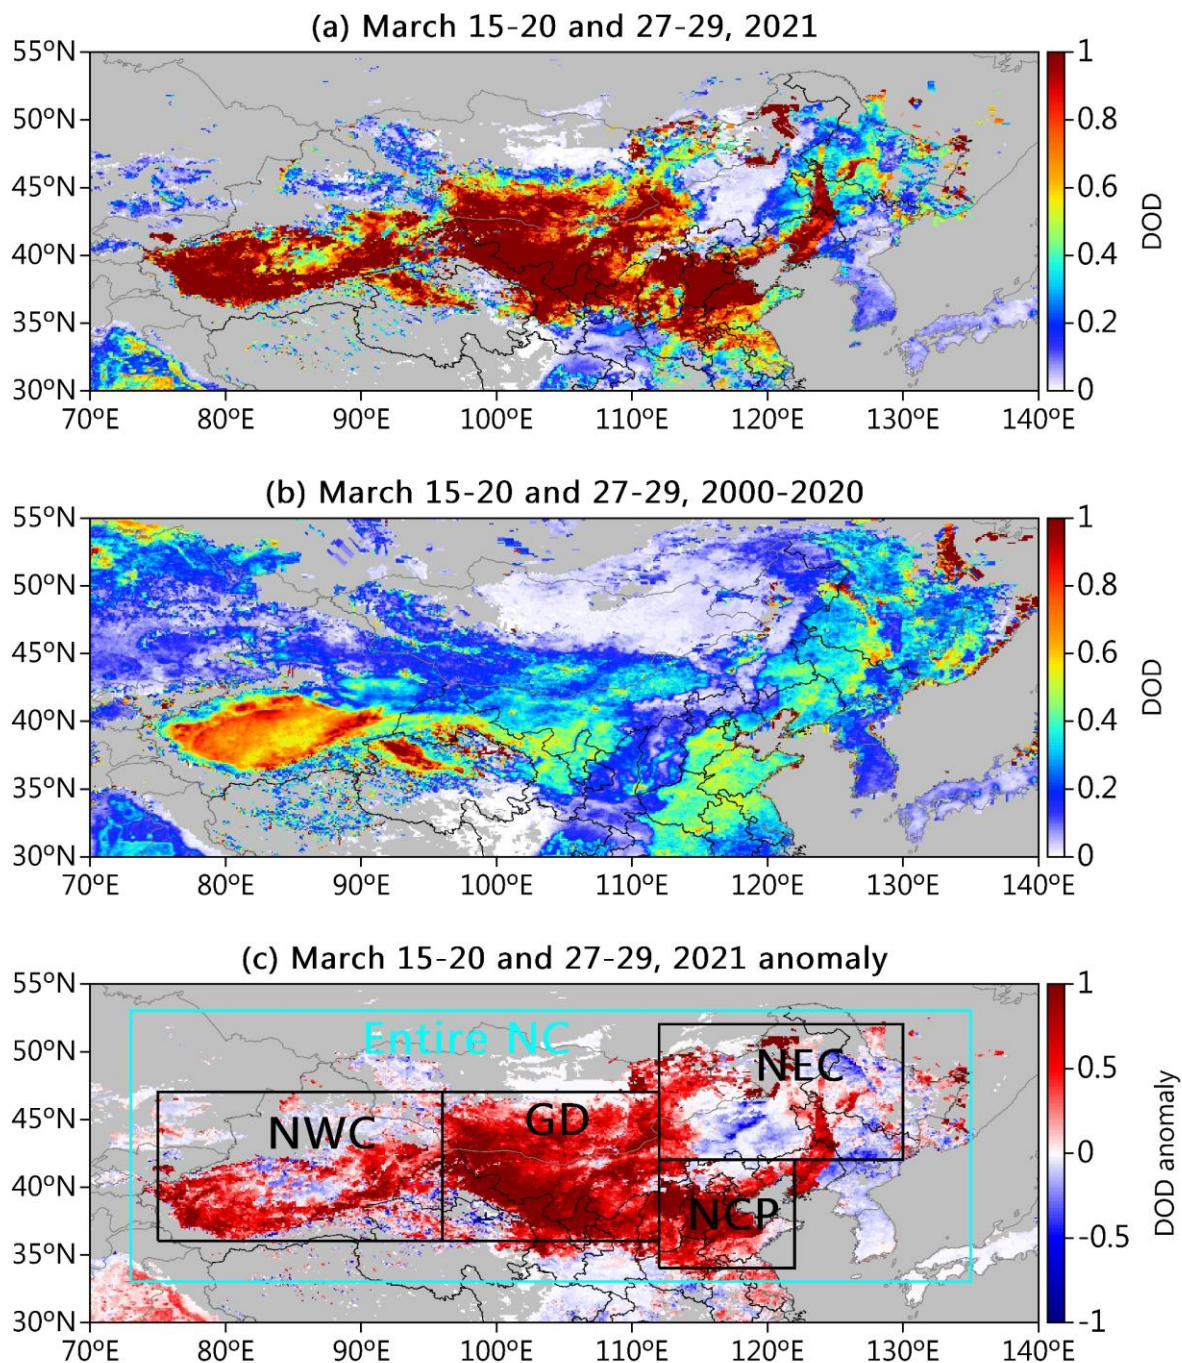

70

**Figure S13:** As in Fig. S9 but for the combined MODIS-retrieved DOD from Terra and Aqua during the combined period of March 15–20 and 27–29.

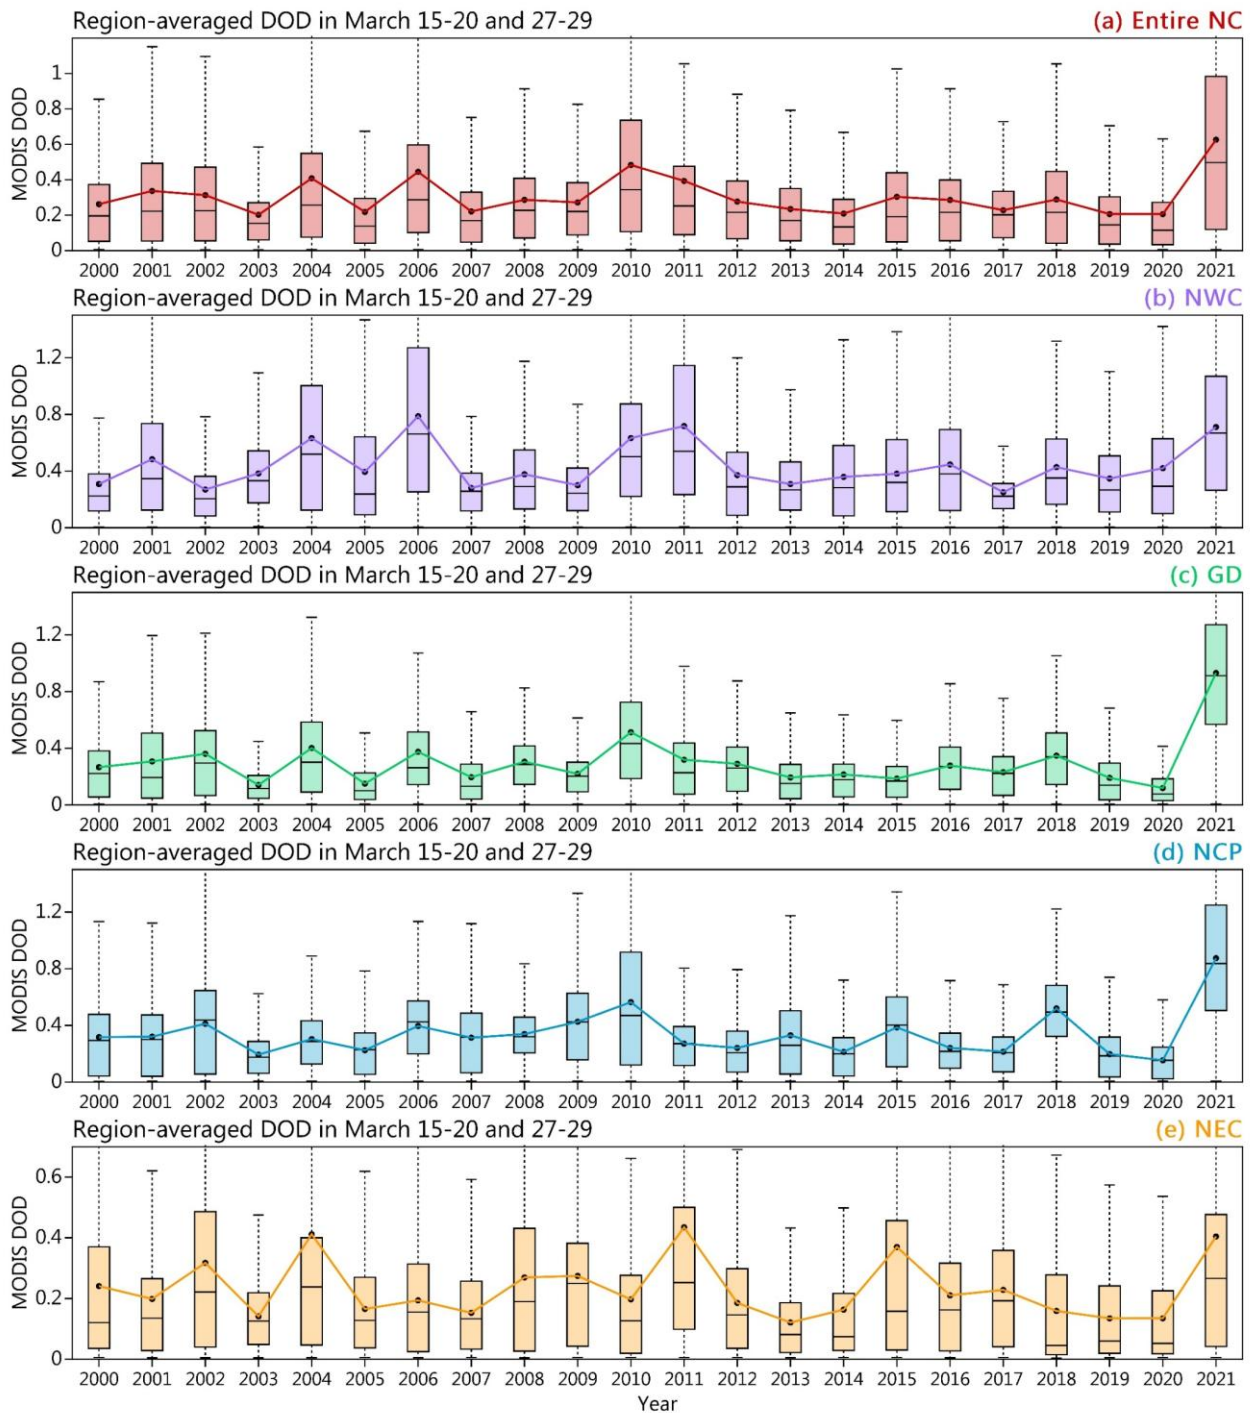

Figure S14: As in Fig. S11 but for the combined MODIS-retrieved DOD from Terra and Aqua during the combined period of March 15–20 and 27–29.



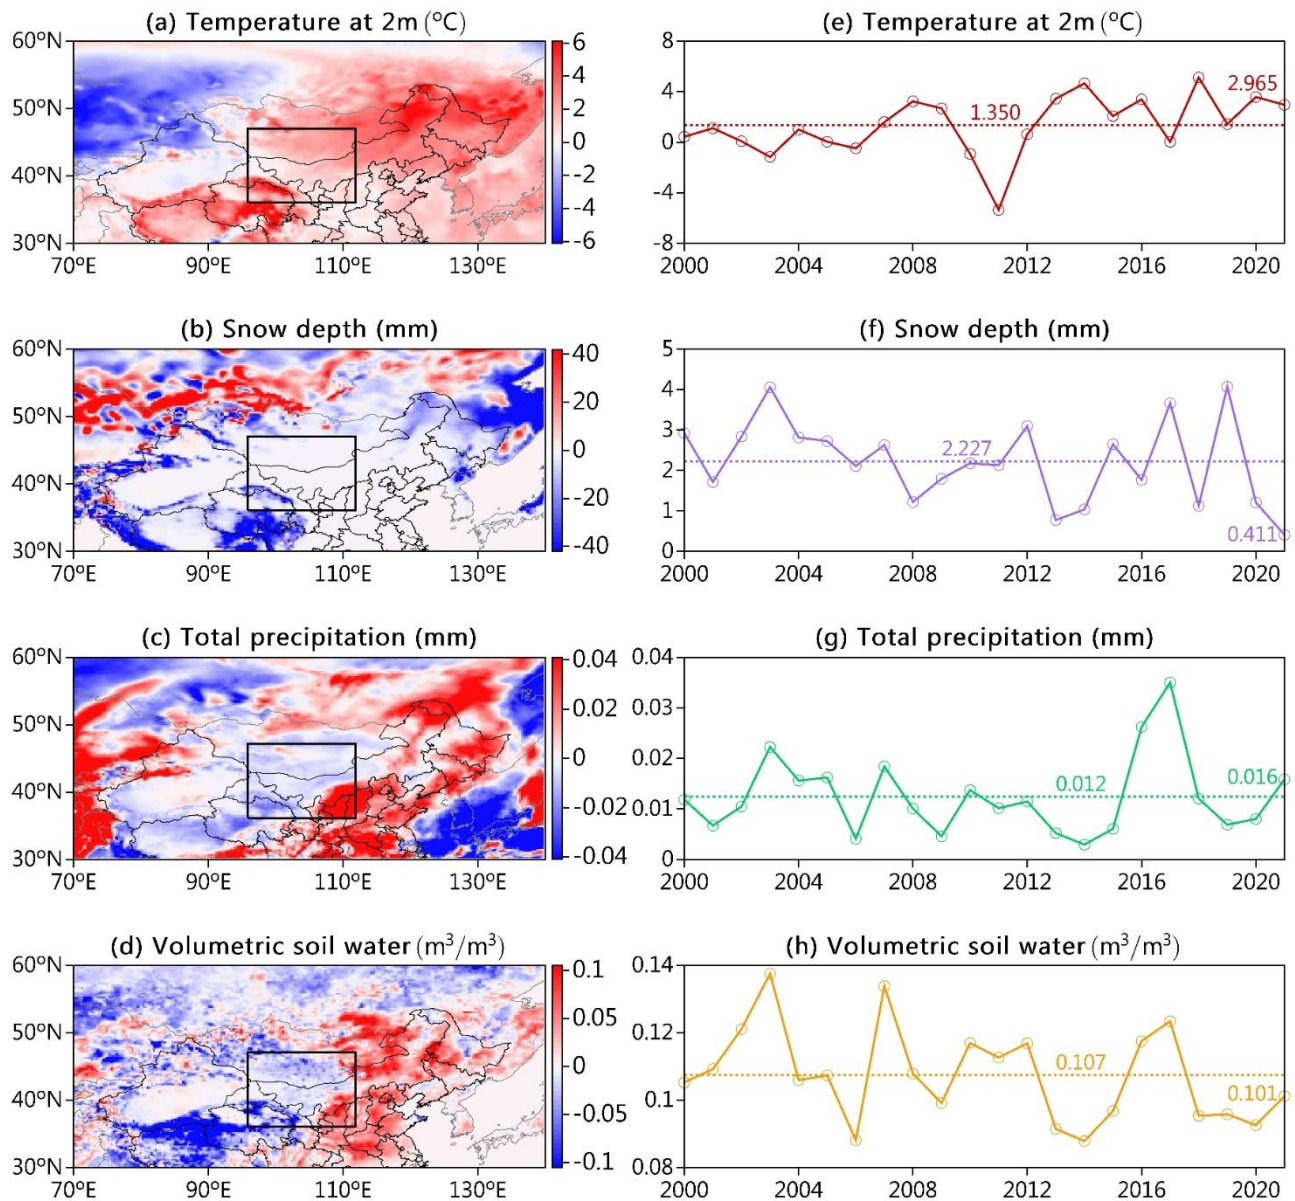

**Figure S15: ERA5 meteorological anomalies two weeks before the 3.27 SDS event (March 27–29, 2021): (a–d) anomalies of temperature at 2m ( °C), and snow depth (mm), total precipitation (mm), and volumetric soil water (m<sup>3</sup> m<sup>-3</sup>) with reference to the 2000–2020 climatology. Black boxes in (a–d) denote the averaging areas (i.e., the GD; 36 °–47 °N; 96 °–112 °W) for the meteorological time series. (e–h) Time series of ERA5 meteorological factors two weeks before the 3.27 event averaged over the GD. The numbers and dashed lines represent the multi-year averages and their locations, respectively. Also, the magnitude for 2021 is labelled.**

75

80
