# Supplementary material for: Two mega sand and dust storm events over northern China in March 2021: transport processes, historical ranking and meteorological drivers
Source: Copernicus journal article supplement (doi:10.5194/acp-2021-933), 2021-12-01
Supplement: Supplementary file 2 [file acp-2021-933-supplement.pdf]

## **Supplementary Information for**

# **Two mega sand and dust storm events over northern China in March 2021: transport processes, historical ranking and meteorological drivers**

Ke Gui<sup>1</sup>, Wenrui Yao<sup>1,2</sup>, Huizheng Che<sup>1,\*</sup>, Linchang An<sup>3</sup>, Lei Li<sup>1</sup>, Yu Zheng<sup>1</sup>, Hujia Zhao<sup>4</sup>, Lei Zhang<sup>1</sup>,

5 Junting Zhong<sup>1</sup>, Yaqiang Wang<sup>1</sup>, Xiaoye Zhang<sup>1</sup>

<sup>1</sup> State Key Laboratory of Severe Weather & Key Laboratory of Atmospheric Chemistry of CMA, Chinese Academy of Meteorological Sciences, Beijing, 100081, China

<sup>2</sup> Department of Atmospheric and Oceanic Sciences & Institute of Atmospheric Sciences, Fudan University, Shanghai, 200438, China

10 <sup>3</sup> National Meteorological Center, CMA, Beijing 100081, China

<sup>4</sup> Institute of Atmospheric Environment, China Meteorological Administration, Shenyang, 110166, China

*Correspondence to:* Huizheng Che ([chehz@cma.gov.cn](mailto:chehz@cma.gov.cn))

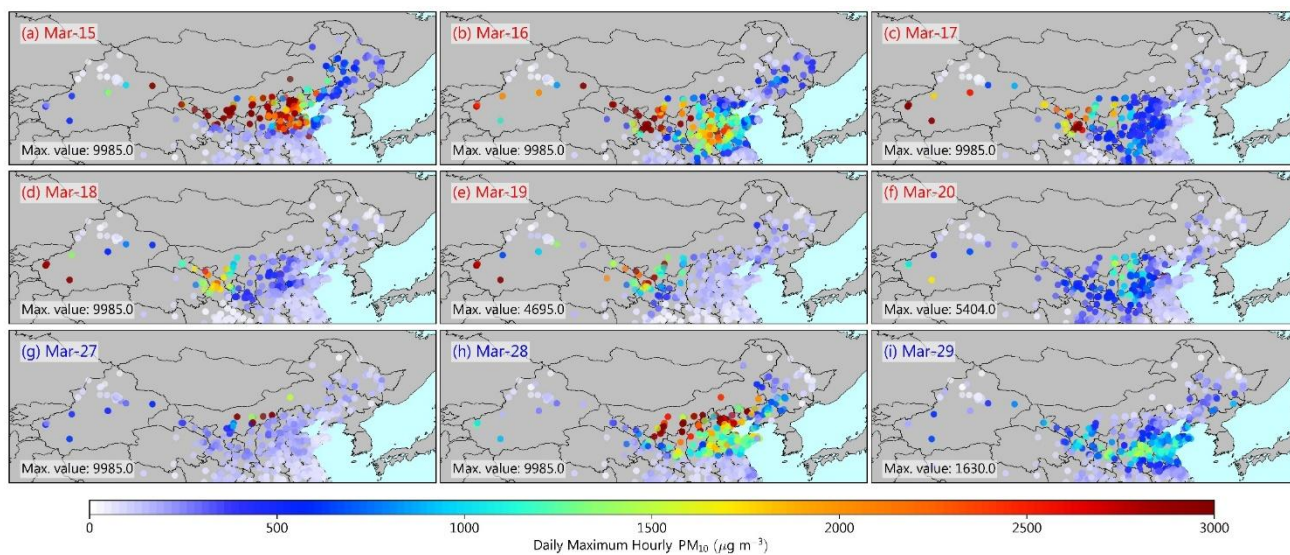

**Figure S1: Evolution of observed daily maximum hourly PM<sub>10</sub> concentrations during (a–f) the 3.15 event (March 15–20, 2021) and (g–i) the 3.27 event (March 27–29, 2021). The single-site maximum values of daily maximum hourly PM<sub>10</sub> concentrations in northern China are marked in the lower-left of each panel.**

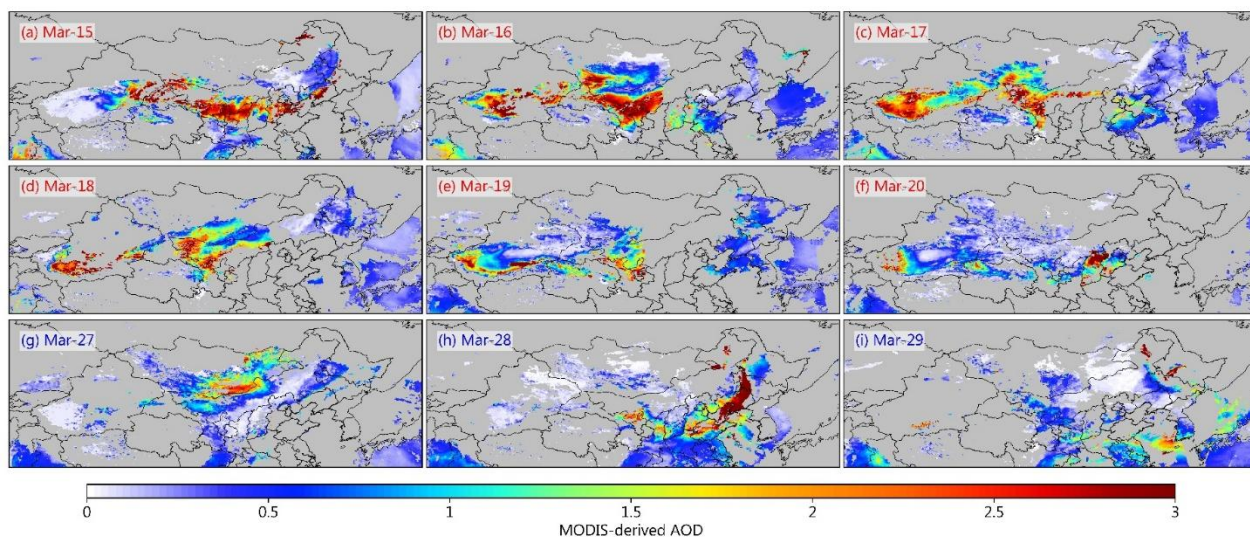

25 **Figure S2: Evolution of Aqua and Terra combined daily mean AOD during (a–f) the 3.15 event and (g–i) the 3.27 event. Gray areas indicate MODIS-derived AOD gaps due to the presence of clouds or other unfavorable conditions that are not conducive to retrieval.**

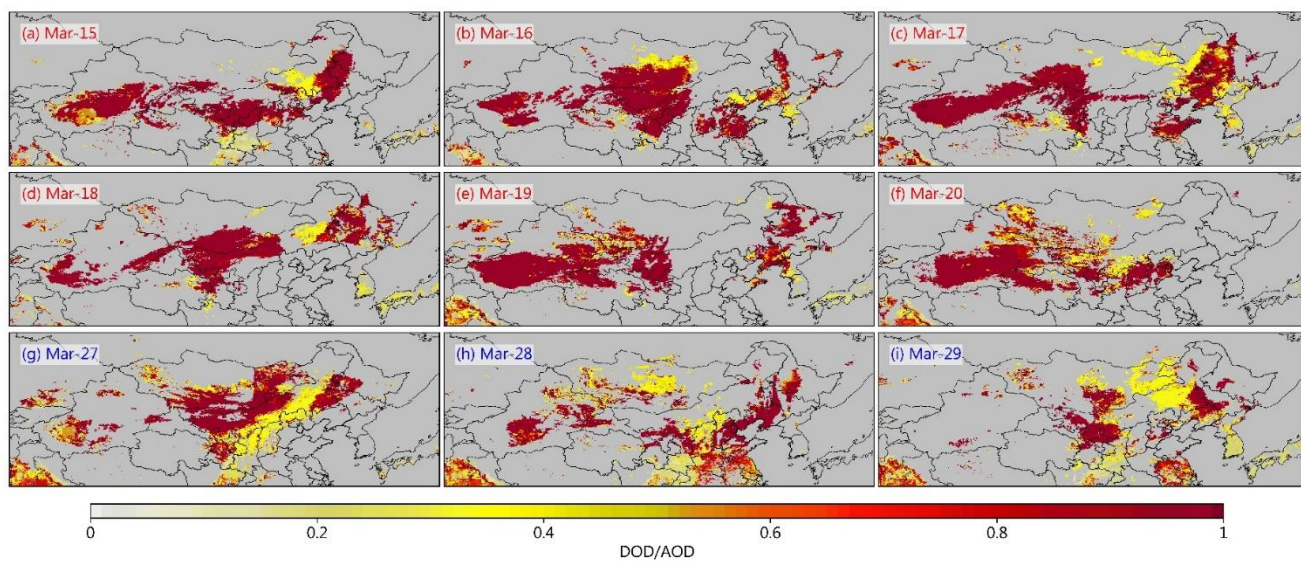

**Figure S3: As in Fig. S2 but for the daily mean DOD as a proportion of total AOD.**



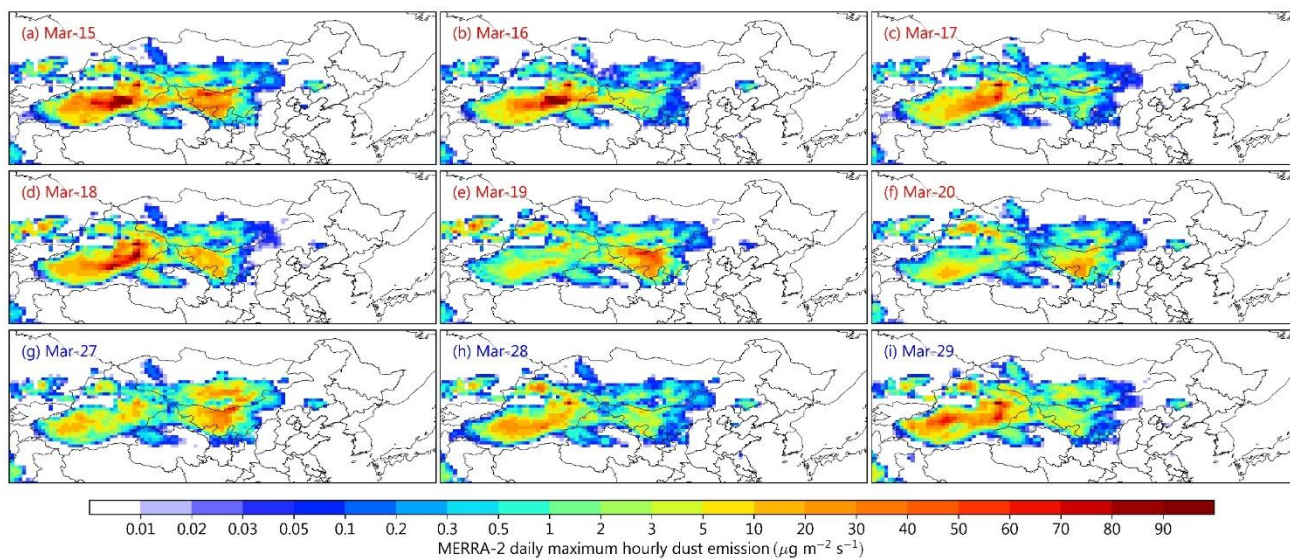

**Figure S4: Evolution of MERRA-2 daily maximum hourly dust emissions for all size bins during (a–f) the 3.15 event and (g–i) the 3.27 event.**

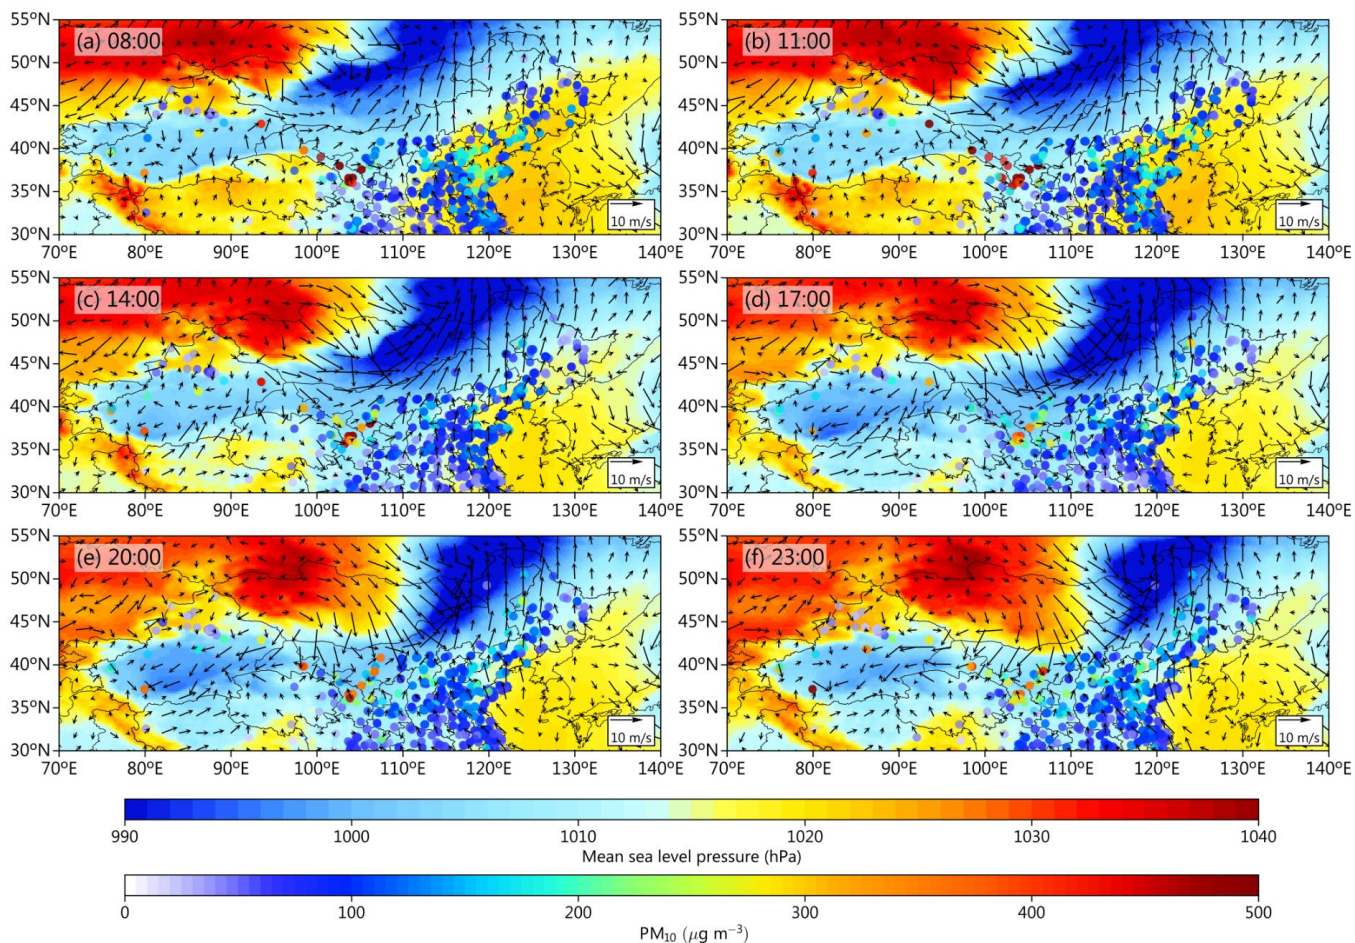

**Figure S5: The 3-h pattern evolutions of ERA5 mean sea level pressure (SLP) and 10 m wind vectors at (a) 08:00 CST (China standard time), (b) 11:00, (c) 14:00, (d) 17:00, (e) 20:00, (f) 23:00 on March 14, 2021. Overlaid on the SLP is the observed 3-h  $PM_{10}$  concentrations from the CNEMC network.**

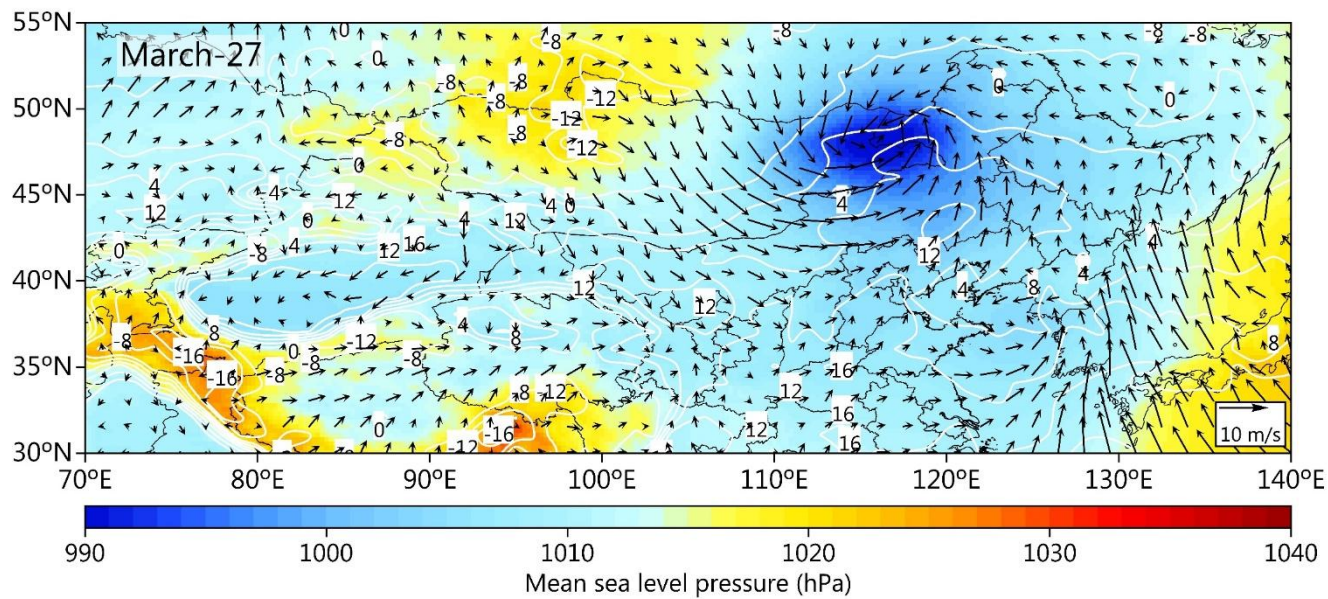

**Figure S6: Daily mean SLP (shading; hPa) and temperature at 2 m (contour; °C) on March 27, 2021. Overlaid on the map are the ERA5 wind vectors at 10 m.**



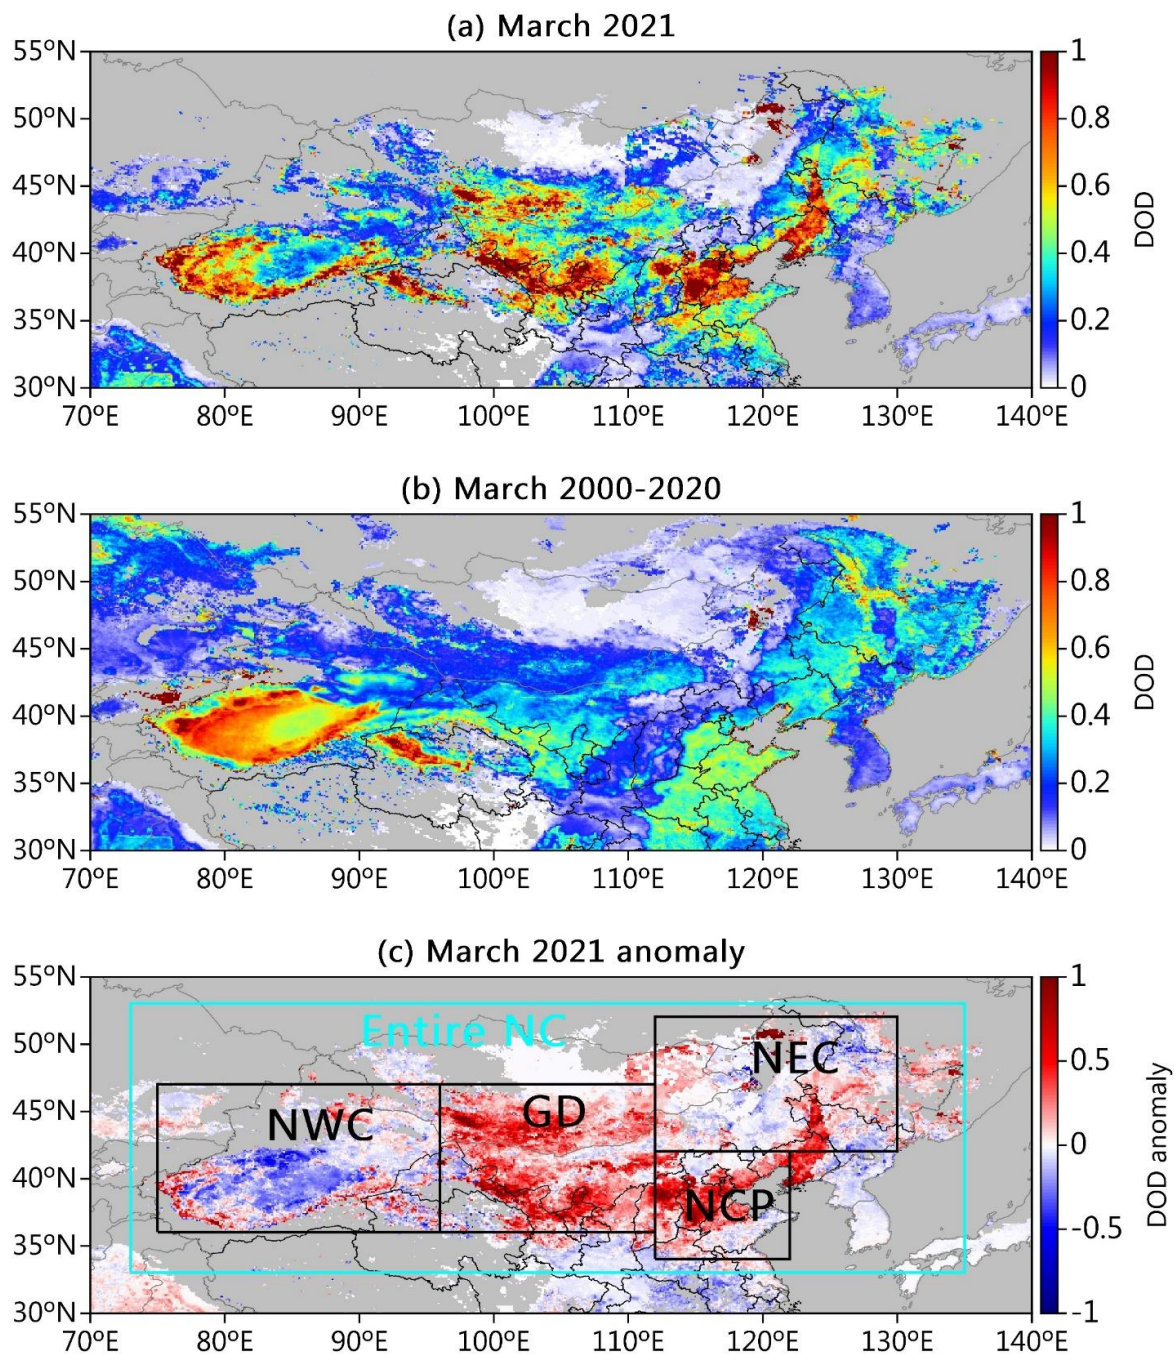

**Figure S7: DOD retrieved from MODIS/Terra: (a) March 2021; (b) March climatology (2000–2020); (c) March 2021 anomaly.**  
**Cyan and black boxes denote the averaging areas for the DOD time series.**



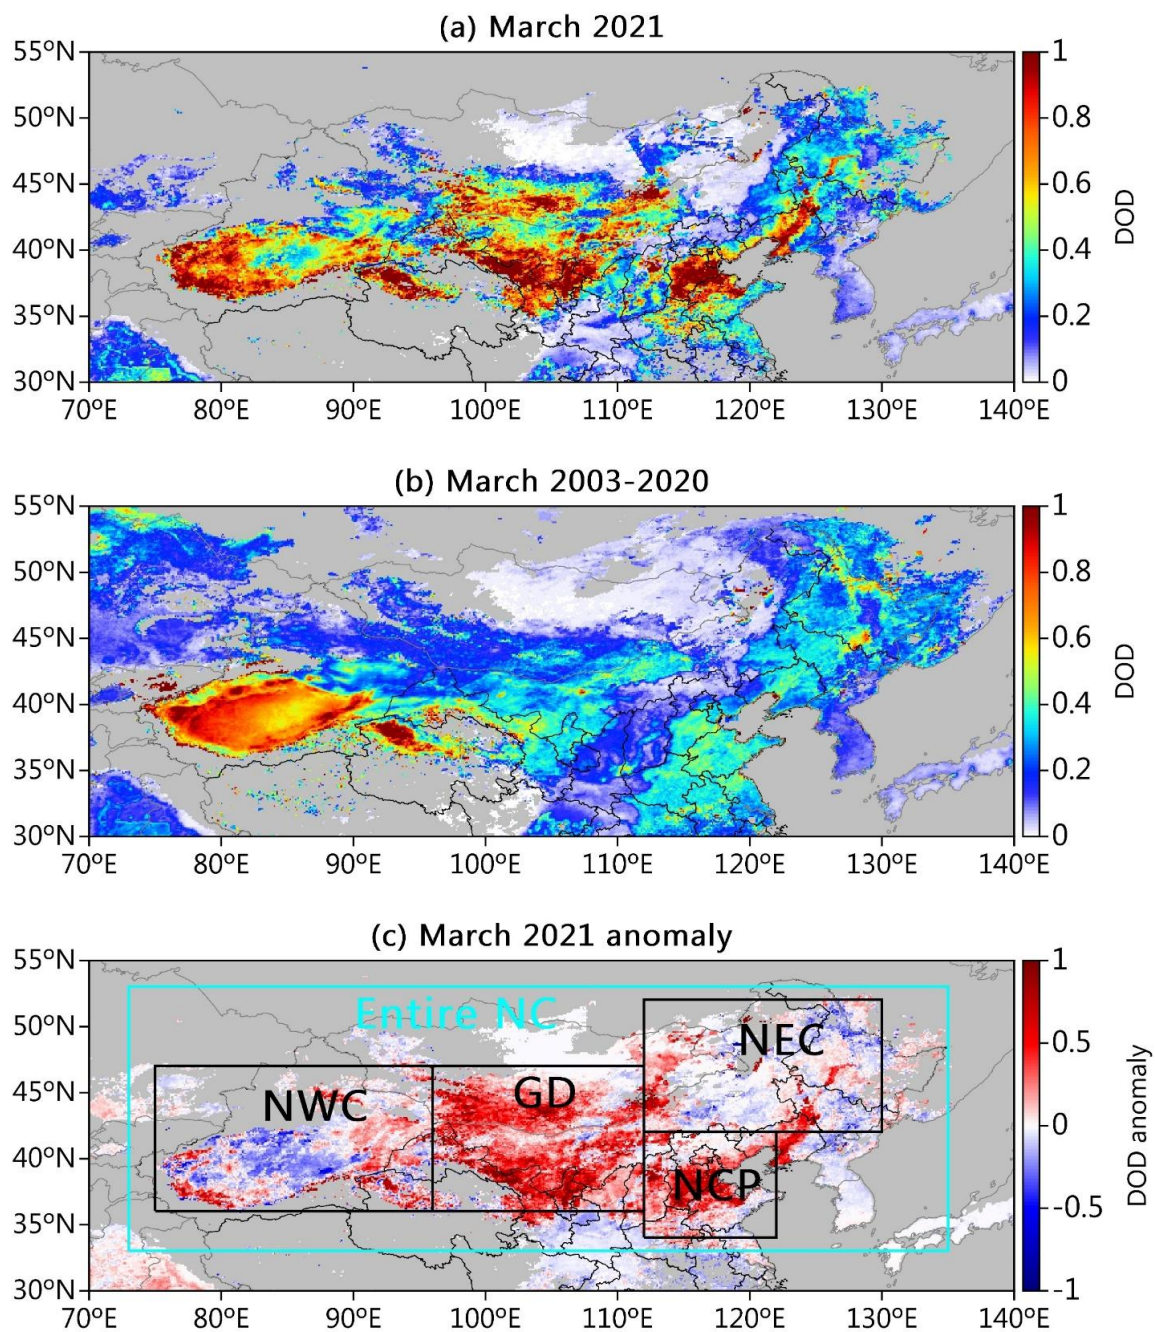

55 **Figure S8: DOD retrieved from MODIS/Aqua: (a) March 2021; (b) March climatology (2003–2020); (c) March 2021 anomaly.**

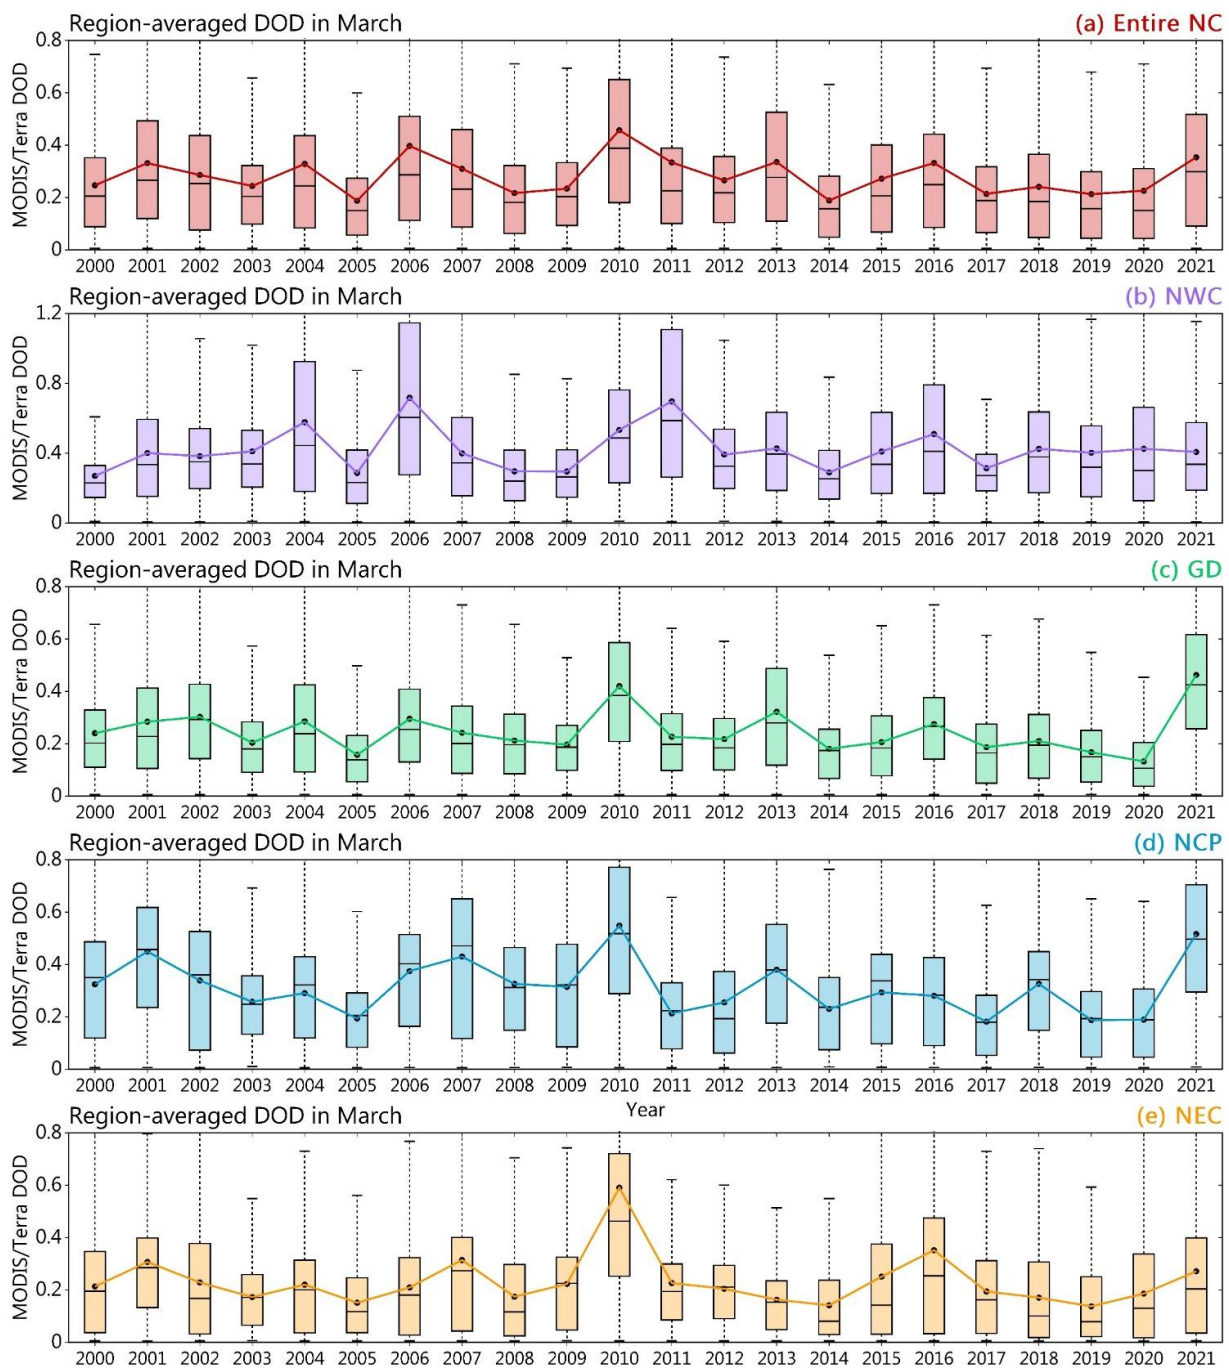

**Figure S9: Time-series boxplots of the regional-averaged DOD retrieved from MODIS/Terra over (a) the entire NC region, (b) NWC, (c) the GD, (d) the NCP, and (e) NEC in March from 2000 to 2021.**

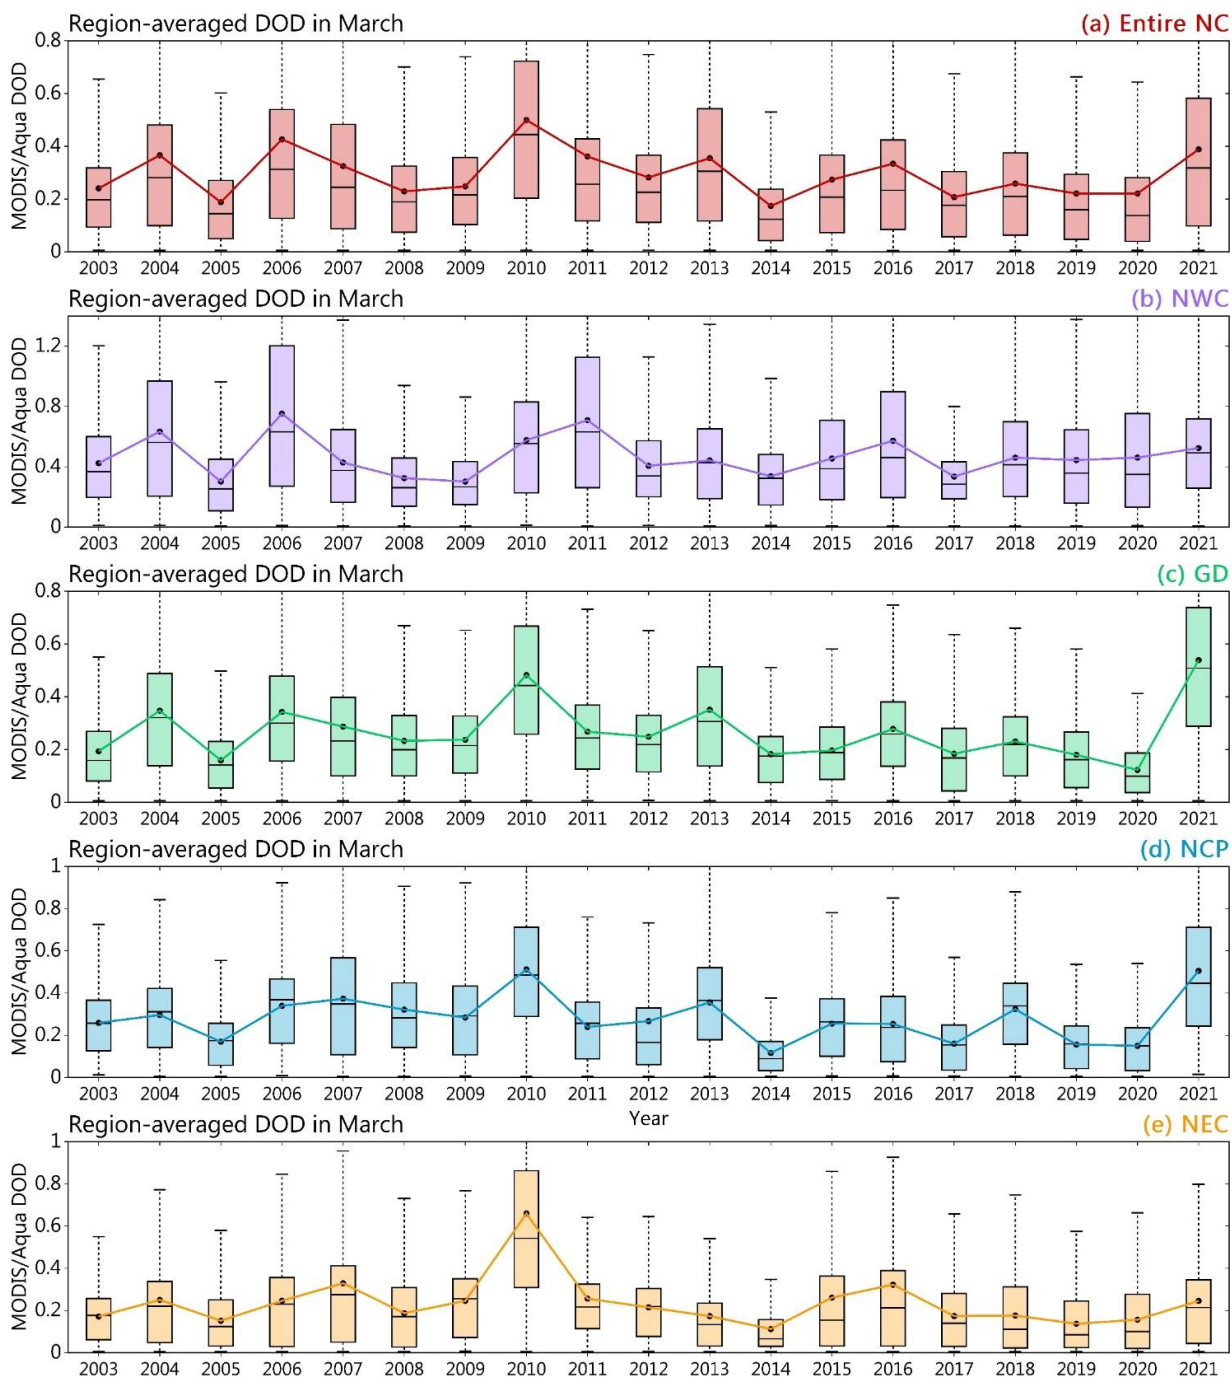

**Figure S10: Time-series boxplots of the regional-averaged DOD retrieved from MODIS/Aqua over (a) the entire NC region, (b) NWC, (c) the GD, (d) the NCP, and (e) NEC in March from 2003 to 2021.**



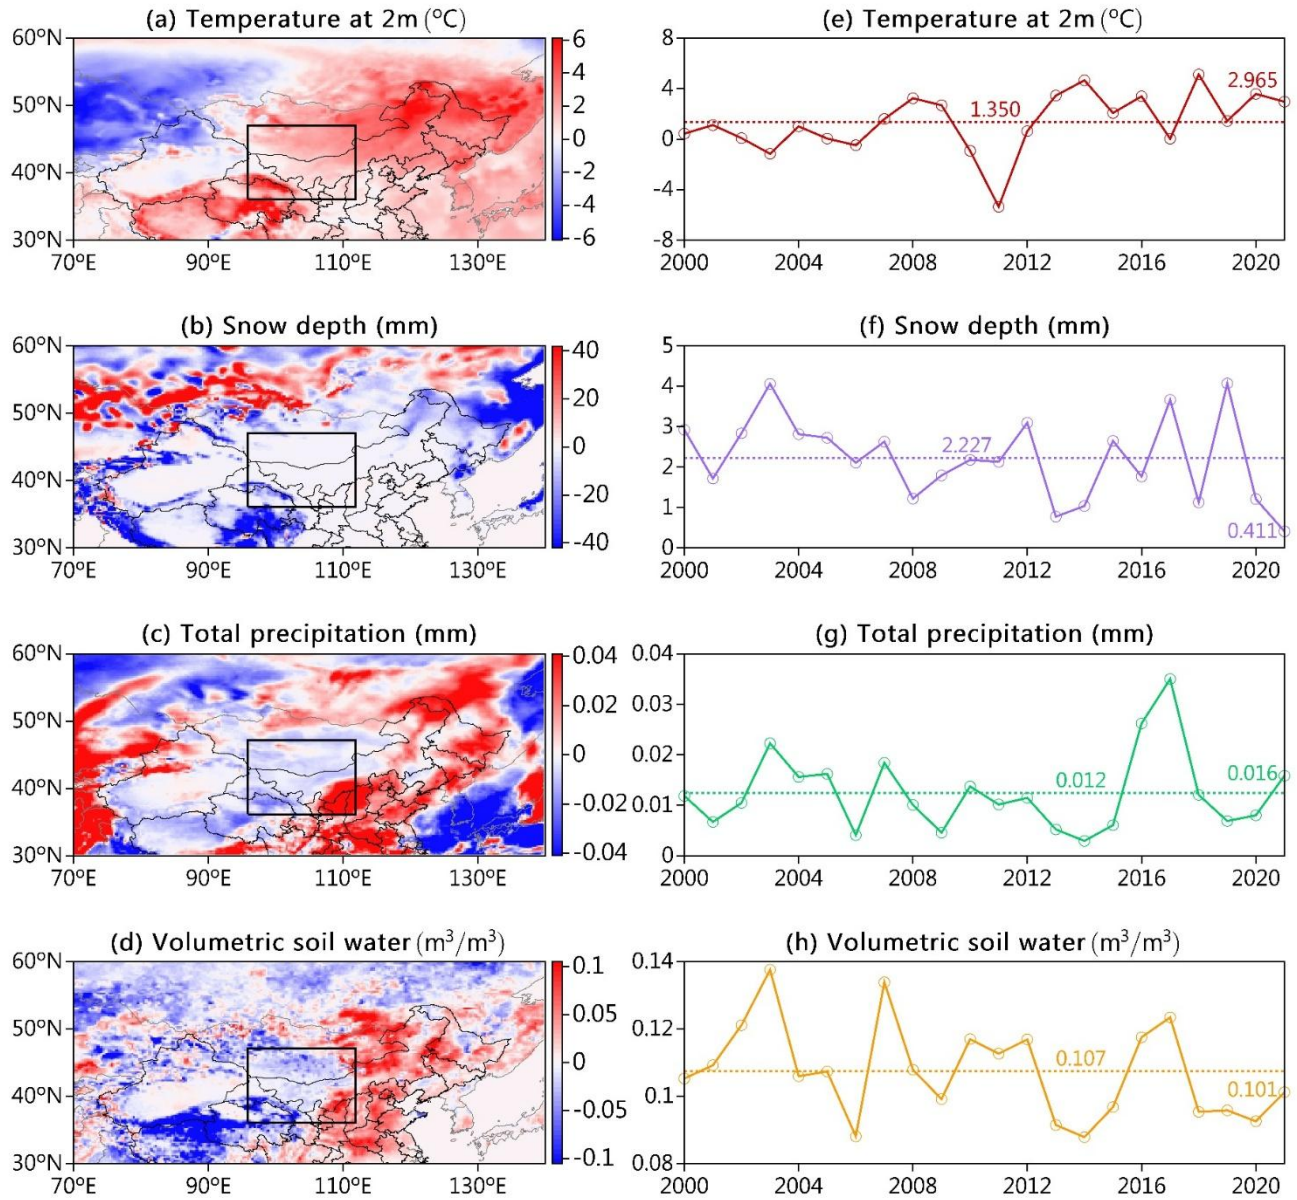

**Figure S11: ERA5 meteorological anomalies two weeks before the 3.27 SDS event (March 27–29, 2021): (a–d) anomalies of temperature at 2m (°C), and snow depth (mm), total precipitation (mm), and volumetric soil water (m<sup>3</sup> m<sup>-3</sup>) with reference to the 2000–2020 climatology. Black boxes in (a–d) denote the averaging areas (i.e., the GD; 36°–47°N; 96°–112°W) for the meteorological time series. (e–h) Time series of ERA5 meteorological factors two weeks before the 3.27 event averaged over the GD. The numbers and dashed lines represent the multi-year averages and their locations, respectively. Also, the magnitude for 2021 is labeled.**
